# Supplementary material
Source: MDPI journal article supplement (https://www.mdpi.com/2410-3888/7/5/298)
Supplement: s1 [file s1]

# Unexpected Discovery of an Ectoparasitic Invasion First Detected in the Baikal Coregonid Fish Population

Irina Kaygorodova <sup>1,\*</sup>, Ekaterina Matveenko <sup>1</sup> and Elena Dzyuba <sup>2</sup>

<sup>1</sup> Laboratory of Analytical and Bioorganic Chemistry, Limnological Institute, Irkutsk 664033, Russia

<sup>2</sup> Laboratory of Ichthyology, Limnological Institute, Irkutsk 664033, Russia

\* Correspondence: irina@lin.irk.ru

**Table S1.** Taxon names and GenBank accession numbers for 74 leeches used in phylogenetic analysis

| Comparison group                       |
|----------------------------------------|
| AY336018_Baicalobdella_torquata        |
| AY336019_Caspiobdella_fadejewi         |
| AY336020_Caspiobdella_fadejewi         |
| MZ202177_Codonobdella_sp               |
| AY336021_Cystobranchnus_respirans      |
| DQ414316_Cystobranchnus_salmositicus   |
| MH235878_Cystobranchnus_sp             |
| MH235851_Cystobranchnus_sp             |
| DQ414317_Cystobranchnus_virginicus     |
| KM095103_Piscicola_sp                  |
| KM095104_Piscicola_sp                  |
| BK059172_Piscicola_geometra            |
| DQ414337_Piscicola_milneri             |
| AF003280_Piscicola_geometra            |
| MF458791_Piscicola_geometra            |
| AY336014_Piscicola_geometra            |
| AY336015_Piscicola_geometra            |
| MH395320_Piscicola_pojmanskae          |
| MH395321_Piscicola_pojmanskae          |
| AY336016_Piscicola_annae               |
| DQ414300_Aestabdella_abditovesiculata  |
| DQ414305_Aestabdella_leiostomi         |
| MN295413_Alexandrobella_makhrovi       |
| MH495818_Ambulobdella_shandikovi       |
| DQ414301_Austrobella_bilobata          |
| DQ414303_Austrobella_californiana      |
| DQ414306_Austrobella_translucens       |
| DQ414311_Bathybella_sawyeri            |
| LC179758_Beringobdella_rectangulata    |
| DQ414307_Branchellion_lobata           |
| DQ414308_Branchellion_parkeri          |
| DQ414309_Branchellion_ravenelii        |
| MK513937_Branchellion_spindolaorum     |
| MH087669_Branchellion_torpedinis       |
| DQ414314_Calliobdella_lophii           |
| KU905901_Calliobdella_vivida           |
| MG422144_Cranganobdella_spitzbergensis |
| DQ414320_Johanssonia_arctica           |
| MK967944_Johanssonia_extrema           |

MH673293\_Heptacyclus\_diminutus  
 DQ414319\_Heptacyclus\_virgatus  
 AY336022\_Limnotrachelobdella\_okae  
 LC275140\_Limnotrachelobdella\_sinensis  
 DQ414321\_Malmiana brunnea  
 DQ414322\_Malmiana\_buthi  
 DQ414326\_Malmiana\_scorpia  
 EF405592\_Megaliobdella\_szidati  
 EF405598\_Moorebdellina\_biannulata  
 KY440059\_Myzobdella\_lugubris  
 DQ414328\_Notobdella\_nototheniae  
 AY336028\_Notostomum\_cyclostomum  
 EF405595\_Notostomum\_laeve  
 AY336010\_Nototheniobdella\_sawyeri  
 DQ414331\_Oceanobdella\_khani  
 DQ414332\_Oceanobdella\_sexoculata  
 MH673291\_Ostreobdella\_californiana  
 EF405596\_Oxytonostoma\_typica  
 DQ414339\_Piscicolaria\_reducta  
 EF405594\_Platybdella\_anarrhichae  
 AY336029\_Pontobdella\_muricata  
 DQ414334\_Pterobdella\_amara  
 MT871866\_Pterobdellina\_vernadskyi  
 DQ414340\_Stibarobdella\_macrothela  
 DQ414343\_Stibarobdella\_tasmanica  
 EF405597\_Trachelobdellina\_glabra  
 AY336030\_Trulliobdella\_capitis  
 KY474378\_Zeylanicobdella\_arugamensis  
 KR608789\_Piscicolidae\_sp  
 KR608790\_Piscicolidae\_sp  
 Piscicola\_Selenga\_C0\_32  
 Piscicola\_Selenga\_65\_A05  
 Piscicola\_Selenga\_K71\_25  
 Piscicola\_Selenga\_K72\_25  
 Piscicola\_Selenga\_C72\_36  
 Piscicola\_Selenga\_C132\_32  
 Piscicola\_Selenga\_C133\_30  
 Piscicola\_Selenga\_C163\_32  
 Piscicola\_Selenga\_C164\_32  
 Piscicola\_Selenga\_C166

---

#### Outgroup

---

AY047325\_Haementeria\_molesta  
 MF150168\_Helobdella\_stagnalis  
 MH643798\_Hemicleipsis\_marginata  
 MH670853\_Glossiphonia\_verrucata  
 OK350346\_Placobdella\_costata  
 AY047318\_Theromyzon\_tessulatum  
 LC413906\_Torix\_tukubana

---

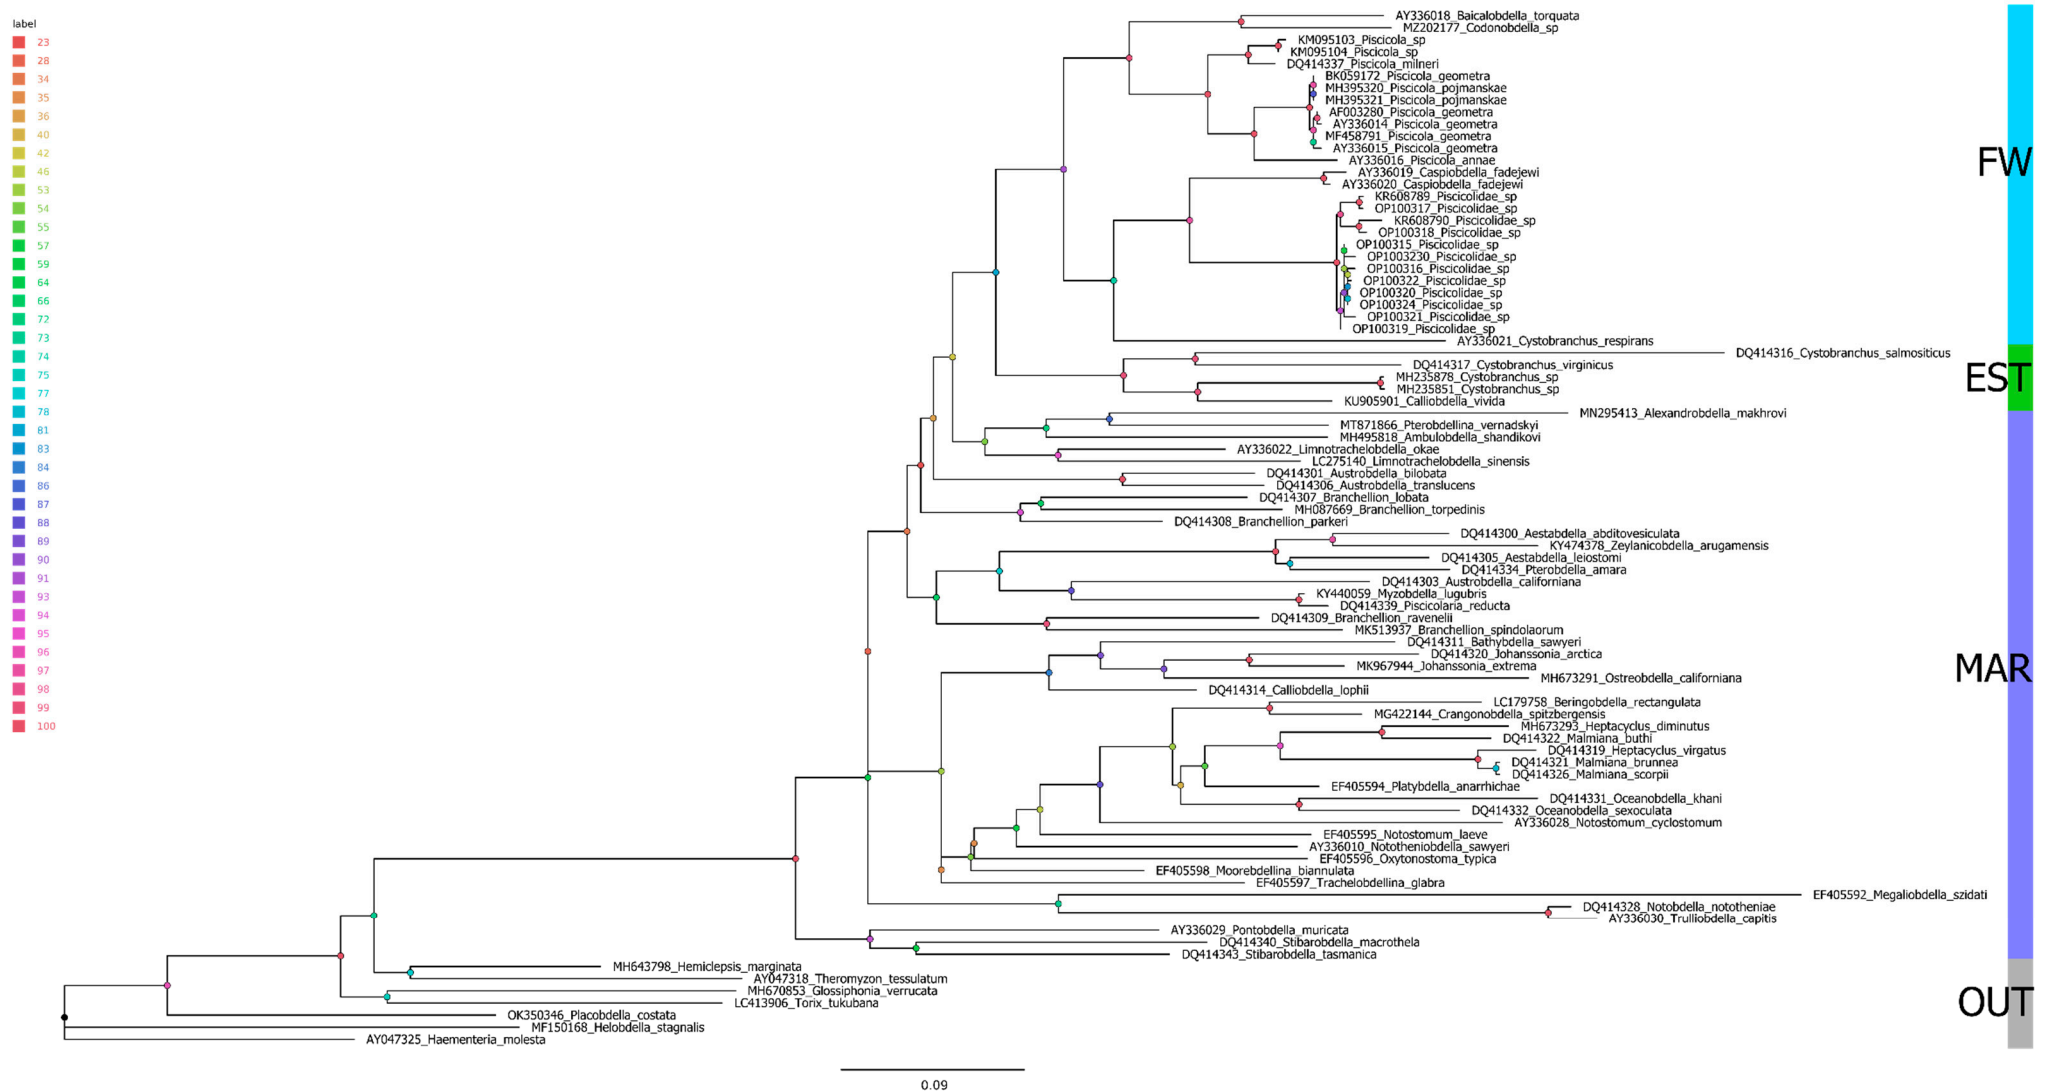

**Figure S1.** The full version of the ML tree based on the *cox1* sequences most closely related to the Selenga leeches parasitizing Baikal omul.
